# Supplementary material for: Helium-Induced Changes in Circulating Caveolin in Mice Suggest a Novel Mechanism of Cardiac Protection
Source: PubMed Central journal article supplement (PMC6600664; doi:10.3390/ijms20112640), 2019-05-29
Supplement: ijms-20-02640-s001.pdf [file ijms-20-02640-s001.pdf]

**Table S1.** Used primers: according to FASEB J. 2007 May;21(7):1565-74.

---

| Caveolin-1 |                      |
|------------|----------------------|
| Forward    | ACGACGACGTGGTCAAGATT |
| Reverse    | GTGCAGGAAGGAGAGAATGG |

---

| Caveolin-3 |                      |
|------------|----------------------|
| Forward    | TCACCACGTTACCGTCTCC  |
| Reverse    | GTGCAGGAAGGAGAGAATGG |

---

| GAPDH   |                      |
|---------|----------------------|
| Forward | TGAAGCAGGCATCTGAGGG  |
| Reverse | CGAAGGTGGAAGAGTGGGAG |

---

**Table S2.** Circulating lipid metabolites were profiled in He treated vs control group using liquid and gas chromatography.

| <b>PubChem_ID</b>       | <b>Compound_Name</b>     | <b>Family</b>                             | <b>Fold change (He/WT)</b> | <b>Correlation</b> | <b>t-stat</b> | <b>p-value</b> | <b>FDR</b> |
|-------------------------|--------------------------|-------------------------------------------|----------------------------|--------------------|---------------|----------------|------------|
| <a href="#">5348046</a> | 1_CE (22:1)              | Cholesteryl ester                         | 1.0                        | 0.6                | 2.9           | 0.01           | 0.8        |
| <a href="#">0</a>       | 1_Ceramide C17           | Ceramide                                  | 1.0                        | 0.6                | 2.5           | 0.03           | 0.8        |
| <a href="#">4458433</a> | 1_Cholesterol d7         | Cholesterol                               | 1.0                        | 0.5                | 2.1           | 0.06           | 0.8        |
| <a href="#">5</a>       | 1_CUDA (pos)             | N-cyclohexyl-N'-dodecanoic acid urea      | 1.0                        | 0.5                | 2.1           | 0.06           | 0.8        |
| <a href="#">5314029</a> | 1_DG (12:0/12:0/0:0)     | Diacylglycerol                            | 1.0                        | 0.5                | 2.1           | 0.06           | 0.8        |
| <a href="#">4</a>       | 1_LPC (17:0)             | Monoacylglycerophosphocholines            | 1.0                        | 0.5                | 2.0           | 0.07           | 0.8        |
| <a href="#">151838</a>  | 1_LPE (17:1)             | Monoacylglycerophosphoethanolamines       | 1.0                        | 0.5                | 1.8           | 0.09           | 0.8        |
| <a href="#">2477946</a> | 1_MG (17:0/0:0/0:0)      | Monoacylglycerol                          | 1.0                        | 0.5                | 1.8           | 0.10           | 0.8        |
| <a href="#">4</a>       | 1_PC (25:0)              | Diacylglycerophosphocholines              | 1.0                        | 0.5                | 1.8           | 0.11           | 0.8        |
| <a href="#">107036</a>  | 1_SM (d35:1)             | Ceramide phosphocholines (sphingomyelins) | 1.0                        | 0.4                | 1.7           | 0.12           | 0.8        |
| <a href="#">2477851</a> | 1_TG (17:0/17:1/17:0)-d5 | Triacylglycerols                          | 1.0                        | 0.4                | 1.6           | 0.13           | 0.8        |
| <a href="#">4689176</a> | Acylcarnitine C18:1      | Acylcarnitine                             | 1.0                        | 0.4                | 1.6           | 0.13           | 0.8        |
| <a href="#">3</a>       | CE (16:1)                | Steryl esters                             | 0.7                        | 0.4                | 1.6           | 0.15           | 0.8        |
| <a href="#">5283479</a> | Ceramide (d42:2)         | Ceramide                                  | 0.7                        | 0.4                | 1.4           | 0.19           | 0.8        |
| <a href="#">5347783</a> | Cholesterol              | Cholesterol                               | 1.0                        | 0.4                | 1.4           | 0.19           | 0.8        |
| <a href="#">0</a>       | DG (36:2)                | Diacylglycerol                            | 0.8                        | 0.4                | 1.4           | 0.20           | 0.8        |
| <a href="#">2283354</a> | GlcCer (d40:1)           | Simple Glc series (Sphingolipids)         | 0.9                        | 0.4                | 1.4           | 0.20           | 0.8        |
| <a href="#">3</a>       |                          |                                           |                            |                    |               |                |            |
| <a href="#">5283568</a> |                          |                                           |                            |                    |               |                |            |
| <a href="#">5997</a>    |                          |                                           |                            |                    |               |                |            |

|                         |                    |                                           |     |     |     |      |     |
|-------------------------|--------------------|-------------------------------------------|-----|-----|-----|------|-----|
| <a href="#">9543722</a> | LPC (15:0)         | Monoacylglycerophosphocholines            | 1.0 | 0.4 | 1.3 | 0.22 | 0.8 |
| <a href="#">6321360</a> |                    |                                           |     |     |     |      |     |
| <a href="#">460602</a>  | PC (16:0/9:0(CHO)) | Diacylglycerophosphocholines              | 0.6 | 0.3 | 1.0 | 0.32 | 0.8 |
| <a href="#">452110</a>  |                    |                                           |     |     |     |      |     |
| <a href="#">5292489</a> | PE (34:2)          | Diacylglycerophosphoethanolamines         | 0.9 | 0.2 | 0.7 | 0.49 | 0.9 |
| <a href="#">3</a>       |                    |                                           |     |     |     |      |     |
| <a href="#">9939941</a> | SM (d33:1)         | Ceramide phosphocholines (sphingomyelins) | 0.9 | 0.2 | 0.6 | 0.55 | 0.9 |
| <a href="#">9543993</a> |                    |                                           |     |     |     |      |     |
| <a href="#">2524046</a> | TG (49:1)          | Triacylglycerols                          | 1.0 | 0.1 | 0.4 | 0.70 | 1.0 |
| <a href="#">0</a>       | TG (49:2)          | Triacylglycerols                          | 1.1 | 0.1 | 0.4 | 0.73 | 1.0 |
| <a href="#">9544045</a> | TG (49:2)          | Triacylglycerols                          | 0.8 | 0.1 | 0.4 | 0.73 | 1.0 |

# Supplementary File: Analysis report metabolomics 30 min

## Metabolomic Data Analysis with MetaboAnalyst 3.0

### 1. Background

The Pathway Analysis module combines results from powerful pathway enrichment analysis with the pathway topology analysis to help researchers identify the most relevant pathways involved in the conditions under study.

There are many commercial pathway analysis software tools, such as Pathway Studio, MetaCore, or Ingenuity Pathway Analysis (IPA), etc. Compared to them, the pathway analysis module was specially developed for metabolomics studies. It uses the high-quality KEGG metabolic pathways as the backend knowledgebase. It integrates many well-established (i.e. univariate analysis, over-representation analysis) methods, as well as novel algorithms and concepts (i.e. Global Test, GlobalAncova, network topology analysis) into pathway analysis. Another feature is a Google-Map style interactive visualization system to deliver the analysis results in an intuitive manner.

### 2. Data Input

Pathway Analysis accepts either a list of compound labels (common names, HMDB IDs or KEGG IDs) with one compound per row, or a compound concentration table with samples in rows and compounds in columns. The second column must be phenotype labels (binary, multi-group, or continuous). The table is uploaded as comma separated values (.csv).

### 3. Compound Name Matching

The first step is to standardize the compound labels used in user uploaded data. This is a necessary step since these compounds will be subsequently compared with compounds contained in the pathway library. There are three outcomes from the step - exact match, approximate match (for common names only), and no match. Users should click the textbfView button from the approximate matched results to manually select the correct one. Compounds without match will be excluded from the subsequently pathway analysis.

**Table S3.** shows the conversion results. Note: 1 indicates exact match, 2 indicates approximate match, and 0 indicates no match. A text file contain the result can be found the downloaded file name *map.csv*.

**Table S3.** Result from Compound Name Mapping (both time points).

|    | Query  | Match                    | HMDB      | PubChem  | KEGG   | Comment |
|----|--------|--------------------------|-----------|----------|--------|---------|
| 1  | C00312 | L-Threo-2-pentulose      | HMDB00751 | 22253    | C00312 | 1       |
| 2  | C00181 | D-Xylose                 | HMDB00098 | 135191   | C00181 | 1       |
| 3  | C00379 | D-Xylitol                | HMDB02917 | 6912     | C00379 | 1       |
| 4  | C00385 | Xanthine                 | HMDB00292 | 1188     | C00385 | 1       |
| 5  | C00183 | L-Valine                 | HMDB00883 | 6287     | C00183 | 1       |
| 6  | C00299 | Uridine                  | HMDB00296 | 6029     | C00299 | 1       |
| 7  | C00366 | Uric acid                | HMDB00289 | 1175     | C00366 | 1       |
| 8  | C00086 | Urea                     | HMDB00294 | 1176     | C00086 | 1       |
| 9  | C00106 | Uracil                   | HMDB00300 | 1174     | C00106 | 1       |
| 10 | C00043 | Uridine diphosphate-N-   | HMDB00290 | 445675   | C00043 | 1       |
| 11 | C00082 | L-Tyrosine               | HMDB00158 | 6057     | C00082 | 1       |
| 12 | C00078 | L-Tryptophan             | HMDB00929 | 6305     | C00078 | 1       |
| 13 | C01157 | 4-Hydroxyproline         | HMDB00725 | 5810     | C01157 | 1       |
| 14 | C00376 | Retinal                  | HMDB01358 | 638015   | C00376 | 1       |
| 15 | C00178 | Thymine                  | HMDB00262 | 1135     | C00178 | 1       |
| 16 | C00214 | Thymidine                | HMDB00273 | 5789     | C00214 | 1       |
| 17 | C00188 | L-Threonine              | HMDB00167 | 6288     | C00188 | 1       |
| 18 | C01620 | Threonic acid            | HMDB00943 | 151152   | C01620 | 1       |
| 19 | C00245 | Taurine                  | HMDB00251 | 1123     | C00245 | 1       |
| 20 | C00059 | Sulfate                  | HMDB01448 | 1117     | C00059 | 1       |
| 21 | C00089 | Sucrose                  | HMDB00258 | 5988     | C00089 | 1       |
| 22 | C00042 | Succinic acid            | HMDB00254 | 1110     | C00042 | 1       |
| 23 | C01530 | Stearic acid             | HMDB00827 | 5281     | C01530 | 1       |
| 24 | C00794 | Sorbitol                 | HMDB00247 | 5780     | C00794 | 1       |
| 25 | C00065 | L-Serine                 | HMDB00187 | 5951     | C00065 | 1       |
| 26 | C00818 | NA                       | NA        | NA       | NA     | 0       |
| 27 | C01685 | Ribonic acid             | HMDB00867 | 5460677  | C01685 | 1       |
| 28 | C00022 | Pyruvic acid             | HMDB00243 | 1060     | C00022 | 1       |
| 29 | C00013 | Pyrophosphate            | HMDB00250 | 644102   | C00013 | 1       |
| 30 | C02067 | Pseudouridine            | HMDB00767 | 15047    | C02067 | 1       |
| 31 | C00148 | L-Proline                | HMDB00162 | 145742   | C00148 | 1       |
| 32 | C03844 | D-Pinitol                | HMDB34219 |          | C03844 | 1       |
| 33 | C02656 | Pimelic acid             | HMDB00857 | 385      | C02656 | 1       |
| 34 | C00346 | O-Phosphoethanolamine    | HMDB00224 | 1015     | C00346 | 1       |
| 35 | C00009 | NA                       | NA        | NA       | NA     | 0       |
| 36 | C05332 | Phenylethylamine         | HMDB12275 | 1001     | C05332 | 1       |
| 37 | C00079 | L-Phenylalanine          | HMDB00159 | 6140     | C00079 | 1       |
| 38 | C01601 | Pelargonic acid          | HMDB00847 | 8158     | C01601 | 1       |
| 39 | C00802 | Oxalureate               | METPA0081 |          | C00802 | 1       |
| 40 | C08362 | Palmitoleic acid         | HMDB03229 | 445638   | C08362 | 1       |
| 41 | C00249 | Palmitic acid            | HMDB00220 | 985      | C00249 | 1       |
| 42 | C01879 | Pyroglutamic acid        | HMDB00267 | 7405     | C01879 | 1       |
| 43 | C00209 | Oxalic acid              | HMDB02329 | 971      | C00209 | 1       |
| 44 | C00077 | Ornithine                | HMDB00214 | 6262     | C00077 | 1       |
| 45 | C00712 | NA                       | NA        | NA       | NA     | 0       |
| 46 | C02721 | NA                       | NA        | NA       | NA     | 0       |
| 47 | C00153 | Niacinamide              | HMDB01406 | 936      | C00153 | 1       |
| 48 | C00645 | N-Acetylmannosamine      | HMDB01129 | 11096158 | C00645 | 1       |
| 49 | C03878 | Beta-N-Acetylglucosamine | HMDB00803 | 24139    | C03878 | 1       |
| 50 | C06424 | Myristic acid            | HMDB00806 | 11005    | C06424 | 1       |
| 51 | C00137 | Myoinositol              | HMDB00211 |          | C00137 | 1       |
| 52 | C00159 | D-Mannose                | HMDB00169 | 18950    | C00159 | 1       |
| 53 | C00711 | NA                       | NA        | NA       | NA     | 0       |
| 54 | C07272 | NA                       | NA        | NA       | NA     | 0       |
| 55 | C00476 | D-Lyxose                 | METPA0046 |          | C00476 | 1       |
| 56 | C00532 | L-Arabitol               | HMDB01851 | 439255   | C00532 | 1       |
| 57 | C00047 | L-Lysine                 | HMDB00182 | 5962     | C00047 | 1       |
| 58 | C01595 | Linoleic acid            | HMDB00673 | 5280450  | C01595 | 1       |
| 59 | C00123 | L-Leucine                | HMDB00687 | 6106     | C00123 | 1       |
| 60 | C02679 | Dodecanoic acid          | HMDB00638 | 3893     | C02679 | 1       |
| 61 | C01432 | NA                       | NA        | NA       | NA     | 0       |
| 62 | C00639 | Prostaglandin F2a        | HMDB01139 | 5283078  | C00639 | 1       |
| 63 | C00407 | L-Isoleucine             | HMDB00172 | 6306     | C00407 | 1       |
| 64 | C00451 | D-threo-Isocitric acid   | HMDB01874 | 5318532  | C00451 | 1       |
| 65 | C00294 | Inosine                  | HMDB00195 | 6021     | C00294 | 1       |
| 66 | C02043 | Indolelactic acid        | HMDB00671 | 92904    | C02043 | 1       |
| 67 | C00954 | Indoleacetic acid        | HMDB00197 | 802      | C00954 | 1       |
| 68 | C00262 | Hypoxanthine             | HMDB00157 | 790      | C00262 | 1       |
| 69 | C00192 | Hydroxylamine            | HMDB03338 | 787      | C00192 | 1       |
| 70 | C00135 | L-Histidine              | HMDB00177 | 6274     | C00135 | 1       |
| 71 | C01586 | NA                       | NA        | NA       | NA     | 0       |
| 72 | C00392 | Mannitol                 | HMDB00765 | 6251     | C00392 | 1       |
| 73 | C00387 | Guanosine                | HMDB00133 | 6802     | C00387 | 1       |
| 74 | C00160 | Glycolic acid            | HMDB00115 | 757      | C00160 | 1       |
| 75 | C00037 | Glycine                  | HMDB00123 | 750      | C00037 | 1       |

|     |        |                         |           |          |        |   |
|-----|--------|-------------------------|-----------|----------|--------|---|
| 76  | C03189 | NA                      | NA        | NA       | NA     | 0 |
| 77  | C05401 | Galactosylglycerol      | HMDB06790 | 656504   | C05401 | 1 |
| 78  | C00116 | Glycerol                | HMDB00131 | 753      | C00116 | 1 |
| 79  | C00258 | Glyceric acid           | HMDB00139 | 439194   | C00258 | 1 |
| 80  | C00489 | Glutaric acid           | HMDB00661 | 743      | C00489 | 1 |
| 81  | C00064 | L-Glutamine             | HMDB00641 | 5961     | C00064 | 1 |
| 82  | C00025 | NA                      | NA        | NA       | NA     | 0 |
| 83  | C00221 | Beta-D-Glucose          | HMDB00516 | 64689    | C00221 | 1 |
| 84  | C00800 | Gulonic acid            | HMDB03290 | 152304   | C00800 | 1 |
| 85  | C00122 | Fumaric acid            | HMDB00134 | 444972   | C00122 | 1 |
| 86  | C02095 | Beta-D-Fucose           | HMDB03081 | 439650   | C02095 | 1 |
| 87  | C02336 | NA                      | NA        | NA       | NA     | 0 |
| 88  | C00189 | Ethanolamine            | HMDB00149 | 700      | C00189 | 1 |
| 89  | C00503 | Erythritol              | HMDB02994 | 222285   | C00503 | 1 |
| 90  | C02277 | Dodecanol               | HMDB11626 | 8193     | C02277 | 1 |
| 91  | C12078 | NA                      | NA        | NA       | NA     | 0 |
| 92  | C01420 | NA                      | NA        | NA       | NA     | 0 |
| 93  | C00097 | L-Cysteine              | HMDB00574 | 5862     | C00097 | 1 |
| 94  | C00791 | Creatinine              | HMDB00562 | 588      | C00791 | 1 |
| 95  | C00327 | Citrulline              | HMDB00904 | 9750     | C00327 | 1 |
| 96  | C00158 | Citric acid             | HMDB00094 | 311      | C00158 | 1 |
| 97  | C00187 | Cholesterol             | HMDB00067 | 11025495 | C00187 | 1 |
| 98  | C01571 | Capric acid             | HMDB00511 | 2969     | C01571 | 1 |
| 99  | C03046 | (S,S)-Butane-2,3-diol   | METPA0353 |          | C03046 | 1 |
| 100 | C01753 | Beta-Sitosterol         | HMDB00852 | 222284   | C01753 | 1 |
| 101 | C08240 | NA                      | NA        | NA       | NA     | 0 |
| 102 | C00099 | Beta-Alanine            | HMDB00056 | 239      | C00099 | 1 |
| 103 | C00180 | Benzoic acid            | HMDB01870 | 243      | C00180 | 1 |
| 104 | C00049 | L-Aspartic acid         | HMDB00191 | 5960     | C00049 | 1 |
| 105 | C00152 | L-Asparagine            | HMDB00168 | 6267     | C00152 | 1 |
| 106 | C00219 | Arachidonic acid        | HMDB01043 | 444899   | C00219 | 1 |
| 107 | C06425 | Arachidic acid          | HMDB02212 | 10467    | C06425 | 1 |
| 108 | C01904 | D-Arabitol              | HMDB00568 | 827      | C01904 | 1 |
| 109 | C00216 | NA                      | NA        | NA       | NA     | 0 |
| 110 | C00872 | Aminomalonic acid       | HMDB01147 | 100714   | C00872 | 1 |
| 111 | C00041 | L-Alanine               | HMDB00161 | 5950     | C00041 | 1 |
| 112 | C06104 | Adipic acid             | HMDB00448 | 196      | C06104 | 1 |
| 113 | C00020 | Adenosine monophosphate | HMDB00045 | 6083     | C00020 | 1 |
| 114 | C00212 | Adenosine               | HMDB00050 | 60961    | C00212 | 1 |
| 115 | C00417 | cis-Aconitic acid       | HMDB00072 | 643757   | C00417 | 1 |
| 116 | C07113 | Acetophenone            | HMDB33910 | 7410     | C07113 | 1 |
| 117 | C08352 | NA                      | NA        | NA       | NA     | 0 |
| 118 | C05659 | 5-Methoxytryptamine     | HMDB04095 | 1833     | C05659 | 1 |
| 119 | C01089 | NA                      | NA        | NA       | NA     | 0 |
| 120 | C06474 | NA                      | NA        | NA       | NA     | 0 |
| 121 | C02630 | 2-Hydroxyglutarate      | HMDB59655 | 43       | C02630 | 1 |
| 122 | C05984 | 2-Hydroxybutyric acid   | HMDB00008 | 11266    | C05984 | 1 |
| 123 | D01947 | NA                      | NA        | NA       | NA     | 0 |
| 124 | C07326 | 1,5-Anhydrosorbitol     | HMDB02712 | 64960    | C07326 | 1 |
| 125 | C06105 | 1,2-Cyclohexanedione    | HMDB31344 |          | C06105 | 1 |
| 126 |        | NA                      | NA        | NA       | NA     | 0 |

## 4. Pathway Analysis

In this step, users are asked to select a pathway library, as well as specify the algorithms for pathway enrichment analysis and pathway topology analysis.

### 4.1. Pathway Library

There are 15 pathway libraries currently supported, with a total of 1173 pathways :

- Homo sapiens (human) [80]
- Mus musculus (mouse) [82]
- Rattus norvegicus (rat) [81]
- Bos taurus (cow) [81]
- Danio rerio (zebrafish) [81]
- Drosophila melanogaster (fruit fly) [79]
- Caenorhabditis elegans (nematode) [78]
- Saccharomyces cerevisiae (yeast) [65]
- Oryza sativa japonica (Japanese rice) [83]
- Arabidopsis thaliana (thale cress) [87]

- Escherichia coli K-12 MG1655 [87]
  - Bacillus subtilis [80]
  - Pseudomonas putida KT2440 [89]
  - Staphylococcus aureus N315 (MRSA/VSSA) [73]
  - Thermotoga maritima [57]
- Your selected pathway library code is mmu (KEGG organisms abbreviation).

#### 4.2. Pathway Enrichment Analysis

Pathway enrichment analysis usually refers to quantitative enrichment analysis directly using the compound concentration values, as compared to compound lists used by over-representation analysis. As a result, it is more sensitive and has the potential to identify **subtle but consistent** changes among compounds involved in the same biological pathway.

Many procedures have been developed in the last decade for quantitative enrichment analysis, the most famous being the Gene Set Enrichment Analysis. Many new and improved methods have been implemented ever since. The enrichment analysis is based on GlobalTest and GlobalAncova. Both methods support enrichment analysis with binary, multi-group, as well as continuous phenotypes. The p values can be approximated based on the asymptotic distribution without using permutations which is computationally very intensive and is not suitable for web applications. Please note, when sample sizes are small, the approximated p values may be slightly less accurate compared to p values obtained by permutation-based method (for details, please refer to the paper by Goeman, J.J. et al.<sup>1</sup> and Hummel, M. et al.<sup>2</sup>). However, since our focus is to identify the most relevant pathways within the pathways in the library, we are more interested in the rank of the pathway, not its absolute p-value. Therefore, this disadvantage may be tolerated.

The selected pathway enrichment analysis method is Globaltest.

#### 4.3. Pathway Topology Analysis

The structure of biological pathways represent our knowledge about the complex relationships among molecules within a cell or a living organism. However, most pathway analysis algorithms fail to take the structural information into consideration when estimating which pathways are significantly changed under conditions of study. It is well-known that changes in more important positions of a network will trigger a more severe impact on the pathway than changes occurred in marginal or relatively isolated positions.

The pathway topology analysis uses two well-established node centrality measures to estimate node importance—degree centrality and betweenness centrality. Degree centrality is defined as the number of links occurred upon a node. For directed graph, there are two types of degree: in-degree for links come from other nodes, and out-degree for links initiated from the current node. Metabolic networks are directed graph. Here we only consider the out-degree for node importance measure. It is assumed that nodes in upstream will have regulatory roles for the downstream nodes, not vice versa. The betweenness centrality measures number of shortest paths going through the node. Since metabolic network is directed, we use relative betweenness centrality for metabolite importance measure. The degree centrality measures focus more on local connectivities, while the betweenness centrality measures focus more on global network topology. For more detailed discussions on various graph-based methods for analysing biological networks, please refer to the article by Tero Aittokallio, T. et al.<sup>3</sup>

Please note, for comparison among different pathways, the node importance values calculated from centrality measures are further normalized by the sum of the importance of the pathway. Therefore, the total/maximum importance of each pathway is 1; the importance measure of each metabolite node is actually the percentage w.r.t the total pathway importance, and the pathway impact value is the cumulative percentage from the matched metabolite nodes.

Your selected node importance measure for topological analysis is relative betweenness centrality.

## 5. Pathway Analysis Result

The results from pathway analysis are presented graphically as well as in a detailed table.

A Google-map style interactive visualization system was implemented to facilitate data exploration. The graphical output contains three levels of view: metabolome view, pathway view, and compound view. Only the metabolome view is shown below. Pathway views and compound views are generated dynamically based on your interactions with the visualization system. They are available in your downloaded files.

<sup>1</sup> Goeman J.J. and Bühlman P. Analyzing gene expression data in terms of gene sets: methodological issues, *Bioinformatics* 2007 23(8):980–987.

<sup>2</sup> Manuela Hummel, Reinhard Meister and Ulrich Mansmann. GlobalANCOVA: exploration and assessment of gene group effects, *Bioinformatics* 2008 24(1):78-85

<sup>3</sup> Tero Aittokallio and Benno Schwikowski. Graph-based methods for analysing networks in cell biology, *Briefings in Bioinformatics* 2006 7(3):243-255

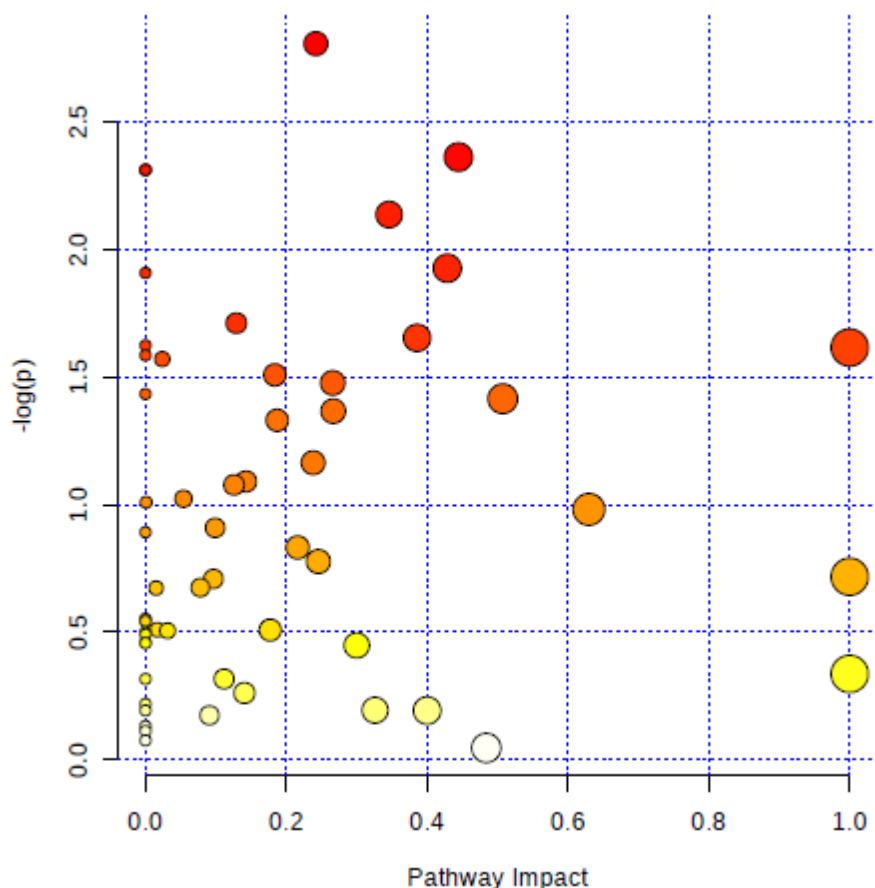

Figure S1. Summary of Pathway Analysis 30 min.

The table below shows the detailed results from the pathway analysis. Since we are testing many pathways at the same time, the statistical  $p$  values from enrichment analysis are further adjusted for multiple testings. In particular, the Total is the total number of



compounds in the pathway; the Hits is the actually matched number from the user uploaded data; the Raw  $p$  is the original  $p$  value calculated from the enrichment analysis; the Holm  $p$  is the  $p$  value adjusted by Holm-Bonferroni method; the FDR  $p$  is the  $p$  value adjusted using False Discovery Rate; the Impact is the pathway impact value calculated from pathway topology analysis.

**Table S4.** Result from Pathway Analysis.

|                                                     | Total Cmpd | Hits | Raw p    | $-\log(p)$ | Holm adjust | FDR      | Impact |
|-----------------------------------------------------|------------|------|----------|------------|-------------|----------|--------|
| Histidine metabolism                                | 15         | 2    | 6.05E-02 | 2.81E+00   | 1.00E+00    | 7.67E-01 | 0.24   |
| beta-Alanine metabolism                             | 17         | 3    | 9.43E-02 | 2.36E+00   | 1.00E+00    | 7.67E-01 | 0.44   |
| Lysine biosynthesis                                 | 4          | 1    | 9.92E-02 | 2.31E+00   | 1.00E+00    | 7.67E-01 | 0.00   |
| Lysine degradation                                  | 23         | 1    | 9.92E-02 | 2.31E+00   | 1.00E+00    | 7.67E-01 | 0.00   |
| Biotin metabolism                                   | 5          | 1    | 9.92E-02 | 2.31E+00   | 1.00E+00    | 7.67E-01 | 0.00   |
| Alanine, aspartate and glutamate metabolism         | 24         | 7    | 1.18E-01 | 2.14E+00   | 1.00E+00    | 7.67E-01 | 0.35   |
| Taurine and hypotaurine metabolism                  | 8          | 2    | 1.46E-01 | 1.93E+00   | 1.00E+00    | 7.67E-01 | 0.43   |
| Thiamine metabolism                                 | 7          | 1    | 1.49E-01 | 1.91E+00   | 1.00E+00    | 7.67E-01 | 0.00   |
| Aminoacyl-tRNA biosynthesis                         | 69         | 17   | 1.81E-01 | 1.71E+00   | 1.00E+00    | 7.67E-01 | 0.13   |
| Glycerolipid metabolism                             | 18         | 2    | 1.92E-01 | 1.65E+00   | 1.00E+00    | 7.67E-01 | 0.39   |
| Butanoate metabolism                                | 22         | 3    | 1.97E-01 | 1.62E+00   | 1.00E+00    | 7.67E-01 | 0.00   |
| Valine, leucine and isoleucine biosynthesis         | 11         | 4    | 1.99E-01 | 1.61E+00   | 1.00E+00    | 7.67E-01 | 1.00   |
| Valine, leucine and isoleucine degradation          | 38         | 3    | 2.05E-01 | 1.58E+00   | 1.00E+00    | 7.67E-01 | 0.00   |
| Glutathione metabolism                              | 26         | 4    | 2.08E-01 | 1.57E+00   | 1.00E+00    | 7.67E-01 | 0.02   |
| Pyruvate metabolism                                 | 23         | 1    | 2.21E-01 | 1.51E+00   | 1.00E+00    | 7.67E-01 | 0.18   |
| Arginine and proline metabolism                     | 44         | 8    | 2.28E-01 | 1.48E+00   | 1.00E+00    | 7.67E-01 | 0.27   |
| Pantothenate and CoA biosynthesis                   | 15         | 4    | 2.39E-01 | 1.43E+00   | 1.00E+00    | 7.67E-01 | 0.00   |
| Glycine, serine and threonine metabolism            | 31         | 6    | 2.43E-01 | 1.41E+00   | 1.00E+00    | 7.67E-01 | 0.51   |
| Pentose and glucuronate interconversions            | 16         | 5    | 2.55E-01 | 1.37E+00   | 1.00E+00    | 7.67E-01 | 0.27   |
| Cysteine and methionine metabolism                  | 27         | 3    | 2.64E-01 | 1.33E+00   | 1.00E+00    | 7.67E-01 | 0.19   |
| Nicotinate and nicotinamide metabolism              | 13         | 1    | 3.12E-01 | 1.16E+00   | 1.00E+00    | 8.23E-01 | 0.24   |
| Pyrimidine metabolism                               | 41         | 6    | 3.36E-01 | 1.09E+00   | 1.00E+00    | 8.23E-01 | 0.14   |
| Purine metabolism                                   | 68         | 10   | 3.41E-01 | 1.08E+00   | 1.00E+00    | 8.23E-01 | 0.13   |
| Steroid biosynthesis                                | 35         | 2    | 3.60E-01 | 1.02E+00   | 1.00E+00    | 8.23E-01 | 0.05   |
| Glycerophospholipid metabolism                      | 30         | 2    | 3.65E-01 | 1.01E+00   | 1.00E+00    | 8.23E-01 | 0.00   |
| Phenylalanine metabolism                            | 11         | 3    | 3.75E-01 | 9.81E-01   | 1.00E+00    | 8.23E-01 | 0.63   |
| Glycolysis or Gluconeogenesis                       | 26         | 2    | 4.03E-01 | 9.09E-01   | 1.00E+00    | 8.23E-01 | 0.10   |
| Propanoate metabolism                               | 20         | 3    | 4.10E-01 | 8.91E-01   | 1.00E+00    | 8.23E-01 | 0.00   |
| Citrate cycle (TCA cycle)                           | 20         | 5    | 4.35E-01 | 8.32E-01   | 1.00E+00    | 8.23E-01 | 0.22   |
| Retinol metabolism                                  | 16         | 1    | 4.60E-01 | 7.77E-01   | 1.00E+00    | 8.23E-01 | 0.25   |
| Phenylalanine, tyrosine and tryptophan biosynthesis | 4          | 2    | 4.88E-01 | 7.17E-01   | 1.00E+00    | 8.23E-01 | 1.00   |
| Primary bile acid biosynthesis                      | 46         | 3    | 4.92E-01 | 7.09E-01   | 1.00E+00    | 8.23E-01 | 0.10   |
| Galactose metabolism                                | 26         | 6    | 5.09E-01 | 6.75E-01   | 1.00E+00    | 8.23E-01 | 0.08   |
| Sphingolipid metabolism                             | 21         | 2    | 5.10E-01 | 6.73E-01   | 1.00E+00    | 8.23E-01 | 0.02   |
| Pentose phosphate pathway                           | 19         | 1    | 5.76E-01 | 5.52E-01   | 1.00E+00    | 8.23E-01 | 0.00   |
| Fatty acid elongation in mitochondria               | 27         | 1    | 5.81E-01 | 5.43E-01   | 1.00E+00    | 8.23E-01 | 0.00   |
| Fatty acid metabolism                               | 39         | 1    | 5.81E-01 | 5.43E-01   | 1.00E+00    | 8.23E-01 | 0.00   |
| Steroid hormone biosynthesis                        | 72         | 1    | 6.01E-01 | 5.09E-01   | 1.00E+00    | 8.23E-01 | 0.02   |
| Tryptophan metabolism                               | 40         | 2    | 6.02E-01 | 5.08E-01   | 1.00E+00    | 8.23E-01 | 0.18   |
| Fructose and mannose metabolism                     | 21         | 2    | 6.03E-01 | 5.05E-01   | 1.00E+00    | 8.23E-01 | 0.03   |
| Selenoamino acid metabolism                         | 15         | 1    | 6.06E-01 | 5.00E-01   | 1.00E+00    | 8.23E-01 | 0.00   |
| D-Glutamine and D-glutamate metabolism              | 5          | 1    | 6.12E-01 | 4.91E-01   | 1.00E+00    | 8.23E-01 | 0.00   |
| Starch and sucrose metabolism                       | 19         | 1    | 6.32E-01 | 4.59E-01   | 1.00E+00    | 8.23E-01 | 0.00   |
| Fatty acid biosynthesis                             | 43         | 4    | 6.33E-01 | 4.57E-01   | 1.00E+00    | 8.23E-01 | 0.00   |
| Sulfur metabolism                                   | 5          | 1    | 6.39E-01 | 4.48E-01   | 1.00E+00    | 8.23E-01 | 0.30   |
| Linoleic acid metabolism                            | 6          | 1    | 7.14E-01 | 3.36E-01   | 1.00E+00    | 8.80E-01 | 1.00   |
| Inositol phosphate metabolism                       | 28         | 1    | 7.29E-01 | 3.17E-01   | 1.00E+00    | 8.80E-01 | 0.11   |
| Ascorbate and aldarate metabolism                   | 9          | 1    | 7.29E-01 | 3.17E-01   | 1.00E+00    | 8.80E-01 | 0.00   |
| Tyrosine metabolism                                 | 44         | 2    | 7.70E-01 | 2.61E-01   | 1.00E+00    | 9.02E-01 | 0.14   |
| Nitrogen metabolism                                 | 9          | 3    | 8.03E-01 | 2.19E-01   | 1.00E+00    | 9.02E-01 | 0.00   |
| Arachidonic acid metabolism                         | 36         | 2    | 8.23E-01 | 1.94E-01   | 1.00E+00    | 9.02E-01 | 0.33   |
| Methane metabolism                                  | 9          | 2    | 8.25E-01 | 1.93E-01   | 1.00E+00    | 9.02E-01 | 0.40   |
| Cyanoamino acid metabolism                          | 6          | 2    | 8.25E-01 | 1.93E-01   | 1.00E+00    | 9.02E-01 | 0.00   |
| Amino sugar and nucleotide sugar metabolism         | 37         | 3    | 8.40E-01 | 1.74E-01   | 1.00E+00    | 9.02E-01 | 0.09   |
| Biosynthesis of unsaturated fatty acids             | 42         | 5    | 8.76E-01 | 1.32E-01   | 1.00E+00    | 9.24E-01 | 0.00   |
| Porphyrin and chlorophyll metabolism                | 27         | 1    | 8.94E-01 | 1.12E-01   | 1.00E+00    | 9.26E-01 | 0.00   |
| Ubiquinone and other terpenoid-quinone biosynthesis | 3          | 1    | 9.27E-01 | 7.56E-02   | 1.00E+00    | 9.43E-01 | 0.00   |
| Glyoxylate and dicarboxylate metabolism             | 18         | 4    | 9.55E-01 | 4.64E-02   | 1.00E+00    | 9.55E-01 | 0.48   |

The report was generated on Wed Apr 19 05:14:08 2017 with R version 3.3.2 (2016-10-31).

## Supplementary File: Analysis report metabolomics 24 hours

User ID: guest8753032602229817641

Pathway Analysis Result 24 hours:

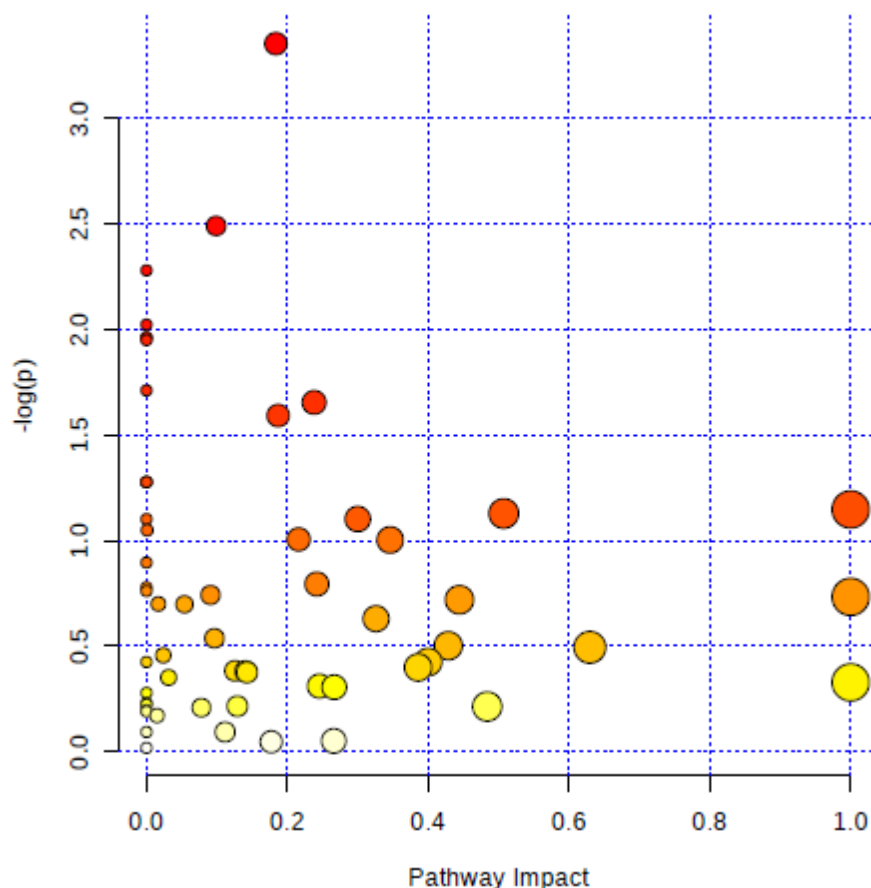

**Figure S2.** Summary of Pathway Analysis 24 hours

The table below shows the detailed results from the pathway analysis. Since we are testing many pathways at the same time, the statistical  $p$  values from enrichment analysis are further adjusted for multiple testings. In particular, the Total is the total number of compounds in the pathway; the Hits is the actually matched number from the user uploaded data; the Raw  $p$  is the original  $p$  value calculated from the enrichment analysis; the Holm  $p$  is the  $p$  value adjusted by Holm-Bonferroni method; the FDR  $p$  is the  $p$  value adjusted using False Discovery Rate; the Impact is the pathway impact value calculated from pathway topology analysis.

**Table S5.** Result from Pathway Analysis 24 hours.

|                                         | Total Cmpd | Hits | Raw $p$  | $-\log(p)$ | Holm adjust | FDR      | Impact |
|-----------------------------------------|------------|------|----------|------------|-------------|----------|--------|
| Pyruvate metabolism                     | 23         | 1    | 3.50E-02 | 3.35E+00   | 1.00E+00    | 9.23E-01 | 0.18   |
| Glycolysis or Gluconeogenesis           | 26         | 2    | 8.29E-02 | 2.49E+00   | 1.00E+00    | 9.23E-01 | 0.10   |
| Biosynthesis of unsaturated fatty acids | 42         | 5    | 1.02E-01 | 2.28E+00   | 1.00E+00    | 9.23E-01 | 0.00   |
| Fatty acid biosynthesis                 | 43         | 4    | 1.32E-01 | 2.02E+00   | 1.00E+00    | 9.23E-01 | 0.00   |
| Fatty acid elongation in mitochondria   | 27         | 1    | 1.41E-01 | 1.96E+00   | 1.00E+00    | 9.23E-01 | 0.00   |
| Fatty acid metabolism                   | 39         | 1    | 1.41E-01 | 1.96E+00   | 1.00E+00    | 9.23E-01 | 0.00   |
| Butanoate metabolism                    | 22         | 3    | 1.42E-01 | 1.95E+00   | 1.00E+00    | 9.23E-01 | 0.00   |
| Starch and sucrose metabolism           | 19         | 1    | 1.81E-01 | 1.71E+00   | 1.00E+00    | 9.23E-01 | 0.00   |
| Nicotinate and nicotinamide metabolism  | 13         | 1    | 1.91E-01 | 1.65E+00   | 1.00E+00    | 9.23E-01 | 0.24   |
| Cysteine and methionine metabolism      | 27         | 3    | 2.04E-01 | 1.59E+00   | 1.00E+00    | 9.23E-01 | 0.19   |
| Lysine biosynthesis                     | 4          | 1    | 2.79E-01 | 1.28E+00   | 1.00E+00    | 9.23E-01 | 0.00   |
| Lysine degradation                      | 23         | 1    | 2.79E-01 | 1.28E+00   | 1.00E+00    | 9.23E-01 | 0.00   |

|                                                     |    |    |          |          |          |          |      |
|-----------------------------------------------------|----|----|----------|----------|----------|----------|------|
| Biotin metabolism                                   | 5  | 1  | 2.79E-01 | 1.28E+00 | 1.00E+00 | 9.23E-01 | 0.00 |
| Valine, leucine and isoleucine biosynthesis         | 11 | 4  | 3.18E-01 | 1.15E+00 | 1.00E+00 | 9.23E-01 | 1.00 |
| Glycine, serine and threonine metabolism            | 31 | 6  | 3.24E-01 | 1.13E+00 | 1.00E+00 | 9.23E-01 | 0.51 |
| Sulfur metabolism                                   | 5  | 1  | 3.32E-01 | 1.10E+00 | 1.00E+00 | 9.23E-01 | 0.30 |
| Propanoate metabolism                               | 20 | 3  | 3.33E-01 | 1.10E+00 | 1.00E+00 | 9.23E-01 | 0.00 |
| Glycerophospholipid metabolism                      | 30 | 2  | 3.50E-01 | 1.05E+00 | 1.00E+00 | 9.23E-01 | 0.00 |
| Citrate cycle (TCA cycle)                           | 20 | 5  | 3.66E-01 | 1.00E+00 | 1.00E+00 | 9.23E-01 | 0.22 |
| Alanine, aspartate and glutamate metabolism         | 24 | 7  | 3.67E-01 | 1.00E+00 | 1.00E+00 | 9.23E-01 | 0.35 |
| Ubiquinone and other terpenoid-quinone biosynthesis | 3  | 1  | 4.09E-01 | 8.95E-01 | 1.00E+00 | 9.23E-01 | 0.00 |
| Histidine metabolism                                | 15 | 2  | 4.52E-01 | 7.93E-01 | 1.00E+00 | 9.23E-01 | 0.24 |
| Pentose phosphate pathway                           | 19 | 1  | 4.59E-01 | 7.78E-01 | 1.00E+00 | 9.23E-01 | 0.00 |
| Porphyrin and chlorophyll metabolism                | 27 | 1  | 4.68E-01 | 7.60E-01 | 1.00E+00 | 9.23E-01 | 0.00 |
| Amino sugar and nucleotide sugar metabolism         | 37 | 3  | 4.76E-01 | 7.42E-01 | 1.00E+00 | 9.23E-01 | 0.09 |
| Phenylalanine, tyrosine and tryptophan biosynthesis | 4  | 2  | 4.81E-01 | 7.33E-01 | 1.00E+00 | 9.23E-01 | 1.00 |
| beta-Alanine metabolism                             | 17 | 3  | 4.87E-01 | 7.19E-01 | 1.00E+00 | 9.23E-01 | 0.44 |
| Steroid hormone biosynthesis                        | 72 | 1  | 4.97E-01 | 6.99E-01 | 1.00E+00 | 9.23E-01 | 0.02 |
| Steroid biosynthesis                                | 35 | 2  | 4.98E-01 | 6.97E-01 | 1.00E+00 | 9.23E-01 | 0.05 |
| Arachidonic acid metabolism                         | 36 | 2  | 5.33E-01 | 6.29E-01 | 1.00E+00 | 9.23E-01 | 0.33 |
| Primary bile acid biosynthesis                      | 46 | 3  | 5.85E-01 | 5.36E-01 | 1.00E+00 | 9.23E-01 | 0.10 |
| Taurine and hypotaurine metabolism                  | 8  | 2  | 6.06E-01 | 5.01E-01 | 1.00E+00 | 9.23E-01 | 0.43 |
| Phenylalanine metabolism                            | 11 | 3  | 6.10E-01 | 4.93E-01 | 1.00E+00 | 9.23E-01 | 0.63 |
| Glutathione metabolism                              | 26 | 4  | 6.34E-01 | 4.56E-01 | 1.00E+00 | 9.23E-01 | 0.02 |
| Methane metabolism                                  | 9  | 2  | 6.54E-01 | 4.24E-01 | 1.00E+00 | 9.23E-01 | 0.40 |
| Cyanoamino acid metabolism                          | 6  | 2  | 6.54E-01 | 4.24E-01 | 1.00E+00 | 9.23E-01 | 0.00 |
| Glycerolipid metabolism                             | 18 | 2  | 6.72E-01 | 3.98E-01 | 1.00E+00 | 9.23E-01 | 0.39 |
| Purine metabolism                                   | 68 | 10 | 6.82E-01 | 3.82E-01 | 1.00E+00 | 9.23E-01 | 0.13 |
| Tyrosine metabolism                                 | 44 | 2  | 6.84E-01 | 3.80E-01 | 1.00E+00 | 9.23E-01 | 0.14 |
| Pyrimidine metabolism                               | 41 | 6  | 6.87E-01 | 3.75E-01 | 1.00E+00 | 9.23E-01 | 0.14 |
| Fructose and mannose metabolism                     | 21 | 2  | 7.04E-01 | 3.51E-01 | 1.00E+00 | 9.23E-01 | 0.03 |
| Linoleic acid metabolism                            | 6  | 1  | 7.21E-01 | 3.27E-01 | 1.00E+00 | 9.23E-01 | 1.00 |
| Retinol metabolism                                  | 16 | 1  | 7.34E-01 | 3.10E-01 | 1.00E+00 | 9.23E-01 | 0.25 |
| Pentose and glucuronate interconversions            | 16 | 5  | 7.37E-01 | 3.05E-01 | 1.00E+00 | 9.23E-01 | 0.27 |
| Nitrogen metabolism                                 | 9  | 3  | 7.57E-01 | 2.78E-01 | 1.00E+00 | 9.23E-01 | 0.00 |
| Selenoamino acid metabolism                         | 15 | 1  | 7.96E-01 | 2.28E-01 | 1.00E+00 | 9.23E-01 | 0.00 |
| Thiamine metabolism                                 | 7  | 1  | 8.00E-01 | 2.24E-01 | 1.00E+00 | 9.23E-01 | 0.00 |
| Aminoacyl-tRNA biosynthesis                         | 69 | 17 | 8.07E-01 | 2.15E-01 | 1.00E+00 | 9.23E-01 | 0.13 |
| Glyoxylate and dicarboxylate metabolism             | 18 | 4  | 8.08E-01 | 2.13E-01 | 1.00E+00 | 9.23E-01 | 0.48 |
| Galactose metabolism                                | 26 | 6  | 8.12E-01 | 2.08E-01 | 1.00E+00 | 9.23E-01 | 0.08 |
| Pantothenate and CoA biosynthesis                   | 15 | 4  | 8.23E-01 | 1.95E-01 | 1.00E+00 | 9.23E-01 | 0.00 |
| Valine, leucine and isoleucine tation               | 38 | 3  | 8.27E-01 | 1.90E-01 | 1.00E+00 | 9.23E-01 | 0.00 |
| Sphingolipid metabolism                             | 21 | 2  | 8.44E-01 | 1.70E-01 | 1.00E+00 | 9.23E-01 | 0.02 |
| Inositol phosphate metabolism                       | 28 | 1  | 9.12E-01 | 9.21E-02 | 1.00E+00 | 9.62E-01 | 0.11 |
| Ascorbate and aldarate metabolism                   | 9  | 1  | 9.12E-01 | 9.21E-02 | 1.00E+00 | 9.62E-01 | 0.00 |
| Arginine and proline metabolism                     | 44 | 8  | 9.51E-01 | 5.00E-02 | 1.00E+00 | 9.72E-01 | 0.27 |
| Tryptophan metabolism                               | 40 | 2  | 9.55E-01 | 4.58E-02 | 1.00E+00 | 9.72E-01 | 0.18 |
| D-Glutamine and D-glutamate metabolism              | 5  | 1  | 9.83E-01 | 1.69E-02 | 1.00E+00 | 9.83E-01 | 0.00 |

The report was generated on Wed Apr 19 04:52:56 2017 with R version 3.3.2 (2016-10-31).
